# Supplementary material
Source: publisher figshare collection journal article supplement (https://asha.figshare.com/articles/dataset/_/6615332)
Supplement: Supplementary file 1 [file 2]

**Supplemental Material S4.** Intervention packages, strategies, results and certainty of evidence.

| Article                   | Intervention package title         | Intervention strategy |                             |                                                                                       |                                |                                             |       | Dependent variables and success estimates or percentages          | Dependent variables and mean PND scores                 | C<br>O<br>E |
|---------------------------|------------------------------------|-----------------------|-----------------------------|---------------------------------------------------------------------------------------|--------------------------------|---------------------------------------------|-------|-------------------------------------------------------------------|---------------------------------------------------------|-------------|
|                           |                                    | Train                 | Model                       | Opportunities                                                                         | Prompt                         | Feedback                                    | Other |                                                                   |                                                         |             |
| Ballin et al. (2012)      | Peer-mediated intervention         | Peers                 | Augmented                   | Choice<br>Question                                                                    | —                              | Expansion<br>Recast                         | —     | SGD <sup>+</sup> 2 of 2                                           | SGD <sup>+</sup> 92%                                    | S*          |
| Bellon-Harn & Harn (2008) | Repeated Reading                   | —                     | Augmented<br>Natural speech | Read<br>Scaffold questions                                                            | Gestural                       | Expansion                                   | —     | SGD <sup>+</sup> 1 of 1<br>SGD <sup>+I</sup> 0 of 1<br>SGD 0 of 1 | SGD <sup>+</sup> 100%<br>SGD <sup>+I</sup> 0%<br>SGD 0% | I           |
| Biggs et al. (2017)       | Peer-mediated intervention         | Peers<br>Paras        | —                           | Comment<br>Device Access<br>Proximity<br>Question<br>Read<br>Time delay<br>Vocabulary | Unspecified                    | Praise<br>Reinforce<br>request              | —     | SGD <sup>+</sup> 4 of 4<br>SGD 1 of 4                             | SGD <sup>+</sup> 96%<br>SGD 75%                         | P           |
| Binger et al. (2008)      | Training<br>Interaction Strategies | Parents               | Augmented<br>Natural speech | Question<br>Read<br>Time delay                                                        | —                              | Expansion<br>Imitate<br>Recast              | —     | SGD <sup>+</sup> 2 of 2<br>SGD <sup>+I</sup> M = 71%              | 100%                                                    | P*          |
| Binger et al. (2010)      | Training<br>Interaction Strategies | Paras                 | Augmented<br>Natural speech | Question<br>Read<br>Time delay                                                        | Verbal                         | Error<br>Correction<br>Expansion<br>Imitate | —     | SGD 3 of 3<br>SGD <sup>I</sup> M = 87%                            | SGD 93% <sup>a</sup>                                    | C           |
| Binger & Light (2007)     | Aided Modeling                     | —                     | Augmented<br>Natural speech | Time delay                                                                            | —                              | —                                           | —     | SGD <sup>+</sup> 2 of 3<br>SGD M = 62%                            | SGD <sup>+</sup> 94%                                    | P*          |
| Bingham et al. (2007)     | Training                           | Paras                 | —                           | Chall. behavior                                                                       | Gestural<br>Verbal<br>Physical | Reinforce<br>request                        | —     | SGD <sup>+</sup> 1 of 1                                           | SGD <sup>+</sup> 100% <sup>a</sup>                      | I           |

|                           |                                        |                |           |                                                                                                           |                    |                                            |                        |                                                                   |                                                                         |    |
|---------------------------|----------------------------------------|----------------|-----------|-----------------------------------------------------------------------------------------------------------|--------------------|--------------------------------------------|------------------------|-------------------------------------------------------------------|-------------------------------------------------------------------------|----|
| Chung & Carter (2013)     | Training<br>Peer mediated intervention | Paras<br>Peers | —         | Comment<br>Device access<br>Env. arrangements<br>Proximity<br>Question<br>Time delay<br>Vocabulary        | Gestural<br>Verbal | Praise<br>Other                            | Attention              | SGD <sup>+</sup> 3 of 4<br>SGD <sup>+I</sup> 2 of 4<br>SGD 3 of 4 | SGD <sup>+</sup> 76%<br>SGD <sup>+I</sup> 67%<br>SGD 66% <sup>a</sup>   | P  |
| Chung & Douglas (2015)    | Training<br>Peer mediated intervention | Paras          | —         | Env. arrangements<br>Proximity<br>Vocabulary                                                              | Gestural<br>Verbal | Praise                                     | Peer<br>attention      | SGD <sup>+</sup> 3 of 3<br>SGD <sup>+I</sup> 3 of 3<br>SGD 3 of 3 | SGD <sup>+</sup> 100%<br>SGD <sup>+I</sup> 92%<br>SGD 100% <sup>a</sup> | S  |
| Cosbey & Johnston (2006)  | Peer mediated intervention             | Peers          | —         | Env. arrangements<br>Preferred items<br>Time delay                                                        | Physical           | Reinforce<br>request                       | Errorless<br>Learning  | SGD 3 of 3                                                        | 100% (after errorless)                                                  | C  |
| Datillo & Camarata (1991) | Self-initiated intervention            | —              | —         | Env. arrangements<br>Preferred items                                                                      | Verbal             | Reinforce<br>request                       | —                      | SGD <sup>+</sup> 1 of 1                                           | SGD <sup>+</sup> 75%                                                    | S* |
| Dicarlo & Banajee (2000)  | Unspecified "naturalistic methods"     | —              | Augmented | Env. arrangements<br>Preferred items<br>Question<br>Time delay                                            | Visual<br>Verbal   | Reinforce<br>request                       | —                      | SGD <sup>+IR</sup> 2 of 2<br>SGD <sup>IR</sup> <i>M</i> = 54%     | SGD <sup>+IR</sup> 78%                                                  | S  |
| Douglas et al. (2013)     | Training<br>Interaction Strategies     | Paras          | Augmented | Comments<br>Device access<br>Env. arrangements<br>Preferred items<br>Question<br>Time delay<br>Vocabulary | —                  | Expansion<br>Other<br>Reinforce<br>request | —                      | SGD <sup>+</sup> 1 of 1                                           | N/A (only 1 intervention point)                                         | I  |
| Durand (1993)             | Functional Communication Training      | —              | —         | Chall. behavior<br>Preferred items<br>Time delay                                                          | Physical<br>Verbal | Reinforce<br>request                       | Functional<br>Analysis | SGD <sup>+IR</sup> 3 of 3                                         | SGD <sup>+IR</sup> 100%                                                 | S  |
| Durand (1999)             | Functional Communication Training      | —              | —         | Chall. behavior<br>Preferred items<br>Time delay                                                          | Physical<br>Verbal | Reinforce<br>request                       | Functional<br>Analysis | SGD <sup>+IR</sup> 5 of 5                                         | SGD <sup>+IR</sup> 100% <sup>a</sup>                                    | P  |

|                            |                                          |               |                                        |                                                                 |                    |                                |                        |                                        |                                                    |   |
|----------------------------|------------------------------------------|---------------|----------------------------------------|-----------------------------------------------------------------|--------------------|--------------------------------|------------------------|----------------------------------------|----------------------------------------------------|---|
| Dyches (1998)              | Coincidental or incidental instruction   | —             | Augmented                              | Preferred items<br>Time delay                                   | Physical<br>Verbal | Reinforce<br>request           | —                      | SGD <sup>+I</sup> 0 of 4<br>SGD 0 of 4 | SGD <sup>+I</sup> 19%<br>SGD 12%                   | I |
| Edmister & Wegner (2015)   | Repeating<br>Reading                     | —             | Augmented                              | Comment<br>Read<br>Scaffold questions<br>Time delay             | —                  | Praise                         | —                      | SGD <sup>+</sup> 0 of 3                | SGD <sup>+</sup> 67%                               | I |
| Finke et al. (2017)        | Least-to-most<br>prompting               | —             | Augmented<br>Natural<br>speech         | Comment<br>Question<br>Time delay                               | Physical<br>Verbal | Expansion<br>Praise<br>Recast  | —                      | SGD <sup>+I</sup> 6 of 6               | SGD <sup>+I</sup> 93%                              | C |
| Ganz et al. (2015)         | —                                        | —             | —                                      | Question<br>Time delay                                          | —                  | —                              | —                      | SGD <sup>I</sup> 1 of 2<br>SGD 1 of 2  | N/A (no<br>responding for 1)                       | I |
| Harding et al. (2009)      | Functional<br>Communication<br>Training  | —             | —                                      | Chall. behavior<br>Preferred items                              | Verbal             | Reinforce<br>request<br>Praise | Functional<br>Analysis | SGD <sup>R</sup> 0 of 2                | SGD <sup>R</sup><br>10% (to BSL)<br>4% (to INT)    | I |
| Iacono & Duncam (1995)     | Scripting                                | —             | Augmented<br>Natural<br>speech<br>Sign | Comment<br>Preferred items<br>Question<br>Time delay            | —                  | Expand<br>Praise               | —                      | SGD <sup>+I</sup> 1 of 1               | SGD <sup>+I</sup><br>67% (to BSL)<br>100% (to INT) | S |
| Johnston et al. (2003)     | —                                        | Peers         | Augmented                              | Env. arrangements<br>Preferred items<br>Proximity<br>Time delay | Verbal<br>Physical | Reinforce<br>request<br>Other  | —                      | SGD 2 of 2                             | SGD 87%                                            | I |
| Kent-Walsh & Binger (2010) | Training<br>Interaction<br>Strategies    | Parents       | Augmented                              | Question<br>Read<br>Time delay                                  | —                  | Other                          | —                      | SGD <sup>+</sup> 6 of 6                | SGD <sup>+</sup> 100%                              | C |
| Light et al. (1999)        | —                                        | Teach.<br>SLP | Augmented                              | Comment<br>Proximity<br>Question<br>Time delay                  | Gestural           | Error<br>correction<br>Praise  | Pre-<br>instruction    | SGD <sup>I</sup> 2 of 2                | SGD <sup>I</sup> 95% <sup>a</sup>                  | I |
| McGregor et al. (1992)     | Unspecified<br>"naturalistic<br>methods" | —             | Augmented                              | Env. arrangements                                               | Verbal             | Error<br>correction<br>Praise  | Pre-<br>instruction    | SGD <sup>I</sup> 3 of 3                | SGD <sup>I</sup> 93%                               | S |

|                                |                                                                  |                 |                                     |                                                                         |                                |                                                 |                     |                                                                    |                                                                           |    |
|--------------------------------|------------------------------------------------------------------|-----------------|-------------------------------------|-------------------------------------------------------------------------|--------------------------------|-------------------------------------------------|---------------------|--------------------------------------------------------------------|---------------------------------------------------------------------------|----|
| McMillan & Renzaglia (2014a,b) | Milieu Teaching<br>Training                                      | Teach.          | Augmented                           | Comment<br>Env. arrangements<br>Time delay<br>Vocabulary                | Physical                       | Error correction<br>Praise<br>Reinforce request | —                   | SGD <sup>I</sup> 4 of 4                                            | SGD <sup>I</sup> 96%                                                      | P  |
| Olive et al. (2007)            | Enhanced Milieu Teaching                                         | —               | Augmented                           | Comment<br>Env. arrangements<br>Follow lead<br>Model play<br>Time delay | Gestural<br>Physical<br>Verbal | Expansion<br>Reinforce request                  | —                   | SGD <sup>IR</sup> 3 of 3<br>SGD <sup>+IR</sup> 3 of 3              | SGD <sup>IR</sup> 93% <sup>a</sup><br>SGD <sup>+IR</sup> 83% <sup>a</sup> | P  |
| Olive et al. (2008)            | Functional Communication Training                                | Parent          | —                                   | Chall. behavior<br>Comment<br>Preferred items<br>Proximity              | Verbal<br>Gestural<br>Physical | Reinforce request                               | Functional Analysis | SGD <sup>+IR</sup> 2 of 4                                          | SGD <sup>+IR</sup> 47%                                                    | I* |
| Schepis et al. (1998)          | Training<br>Unspecified "naturalistic methods"                   | Teach.<br>Paras | Augmented                           | Follow lead<br>Preferred items<br>Proximity<br>Question<br>Time delay   | Verbal<br>Gestural<br>Physical | Reinforce request                               | —                   | SGD <sup>+</sup> 6 of 6<br>SGD <sup>I</sup> M = 53%<br>SGD M = 75% | SGD <sup>+</sup> 100%                                                     | I  |
| Taylor & Iacono (2003)         | Scripting                                                        | —               | Augmented<br>Natural speech<br>Sign | Follow lead<br>Model play<br>Time delay                                 | —                              | Other                                           | —                   | SGD <sup>+</sup> 1 of 3                                            | SGD <sup>+</sup> 50% (to speech and sign)                                 | I  |
| Trembath et al. (2009)         | Peer mediated intervention<br>Unspecified "naturalistic methods" | Peers           | Augmented                           | Comment<br>Model play<br>Time delay                                     | —                              | —                                               | —                   | SGD <sup>+</sup> 1 of 3                                            | SGD <sup>+</sup> 68%<br>(to BSL)<br>37% (to INT)                          | I  |
| Trottier et al. (2011)         | Peer mediated intervention                                       | Peers           | Augmented                           | Preferred items<br>Time delay                                           | Verbal<br>Gestural             | —                                               | —                   | SGD <sup>+I</sup> 2 of 2                                           | SGD <sup>+I</sup> 87% <sup>a</sup>                                        | P  |

*Note.* Paras = paraprofessionals; SLP = speech-language pathologist; teach = teachers; chall. behavior = challenging behavior; env. arrangements = environmental arrangements; SGD = measured speech-generating device responses only; BSL = baseline with no SGD; INT = comparative intervention with no SGD; COE = certainty of evidence; C = conclusive; P = preponderant; S = suggestive; I = inconclusive.

<sup>+</sup>Measured SGD responses and other forms of communication. <sup>I</sup>Defined as independent. <sup>R</sup>Measured only requesting. <sup>a</sup>All baseline scores = 0%. \*Rating may be higher if other participants or outcomes included.

## References

- Ballin, L., Balandin, S., & Stancliffe, R. J. (2012). The speech generating device (SGD) mentoring program: Supporting the development of people learning to use an SGD. *Journal of Developmental and Physical Disabilities, 25*, 437–459.
- Bellon-Harn, M. L., & Harn, W. E. (2008). Scaffolding strategies during repeated storybook reading an extension using a voice output communication aid. *Focus on Autism and Other Developmental Disabilities, 23*, 112–124.
- Biggs, E. E., Carter, E. W., & Gustafson, J. (2017). Efficacy of peer support arrangements to increase peer interaction and AAC use. *American Journal on Intellectual and Developmental Disabilities, 122*, 25–48.
- Binger, C., Kent-Walsh, J., Berens, J., Del Campo, S., & Rivera, D. (2008). Teaching Latino parents to support the multi-symbol message productions of their children who require AAC. *Augmentative and Alternative Communication, 24*, 323–338.
- Binger, C., Kent-Walsh, J., Ewing, C., & Taylor, S. (2010). Teaching educational assistants to facilitate the multisymbol message productions of young students who require augmentative and alternative communication. *American Journal of Speech-Language Pathology, 19*(2), 108–120.
- Binger, C., & Light, J. (2007). The effect of aided AAC modeling on the expression of multi-symbol messages by preschoolers who use AAC. *Augmentative and Alternative Communication, 23*, 30–43.
- Bingham, M. A., Spooner, F., & Browder, D. (2007). Training paraeducators to promote the use of augmentative and alternative communication by students with significant disabilities. *Education and Training in Developmental Disabilities, 42*, 339–352.
- Chung, Y. C., & Carter, E. W. (2013). Promoting peer interactions in inclusive classrooms for students who use speech-generating devices. *Research and Practice for Persons With Severe Disabilities, 38*, 94–109.
- Chung, Y. C., & Douglas, K. H. (2015). A peer interaction package for students with autism spectrum disorders who use speech-generating devices. *Journal of Developmental and Physical Disabilities, 27*, 831–849.
- Cosbey, J. E., & Johnston, S. (2006). Using a single-switch voice output communication aid to increase social access for children with severe disabilities in inclusive classrooms. *Research and Practice for Persons with Severe Disabilities, 31*, 144–156.
- Datilo, J., & Camarata, S. (1991). Facilitating conversation through self-initiated augmentative communication treatment. *Journal of Applied Behavior Analysis, 24*, 369–378.
- Dicarlo, C. F., & Banajee, M. (2000). Using voice output devices to increase initiations of young children with disabilities. *Journal of Early Intervention, 23*, 191–199.
- Douglas, S. N., Light, J. C., & McNaughton, D. B. (2013). Teaching paraeducators to support the communication of young children with complex communication needs. *Topics in Early Childhood Special Education, 33*, 91–101.
- Durand, V. (1993). Functional communication training using assistive devices: Effects on challenging behavior and affect. *Augmentative and Alternative Communication, 9*, 168–176.
- Durand, V. M. (1999). Functional communication training using assistive devices: Recruiting natural communities of reinforcement. *Journal of Applied Behavior Analysis, 32*, 247–267.
- Dyches, T. T. (1998). Effects of switch training on the communication of children with autism and severe disabilities. *Focus on Autism and Other Developmental Disabilities, 13*, 151–162.
- Edmister, E., & Wegner, J. (2015). Repeated reading, turn taking, and augmentative and alternative communication (AAC). *International Journal of Disability, Development and Education, 62*, 319–338.
- Finke, E. H., Davis, J. M., Benedict, M., Goga, L., Kelly, J., Palumbo, L., . . . Waters, S. (2017). Effects of a least-to-most prompting procedure on multisymbol message production in children with autism spectrum disorder who use augmentative and alternative communication. *American Journal of Speech-Language Pathology, 26*, 81–98.
- Ganz, J. B., Hong, E. R., Gilliland, W., Morin, K., & Svenkerud, N. (2015). Comparison between visual scene displays and exchange-based communication in augmentative and alternative communication for children with ASD. *Research in Autism Spectrum Disorders, 11*, 27–41.
- Harding, J. W., Wacker, D. P., Berg, W. K., Winborn-Kemmerer, L., Lee, J. F., & Ibrahimovic, M. (2009). Analysis of multiple manding topographies during functional communication training. *Education & Treatment of Children, 32*, 21–36.
- Iacono, T. A., & Duncum, J. E. (1995). Comparison of sign alone and in combination with an electronic communication device in early language intervention: Case study. *Augmentative and Alternative Communication, 11*, 249–259.

- Johnston, S., McDonnell, A., & Nelson, C. (2003). Teaching functional communication skills using augmentative and alternative communication in inclusive settings. *Journal of Early Intervention, 25*, 263–280.
- Kent-Walsh, J., Binger, C., & Hasham, Z. (2010). Effects of parent instruction on the symbolic communication of children using augmentative and alternative communication during storybook reading. *American Journal of Speech-Language Pathology, 19*, 97–107.
- Light, J., Binger, C., Agate, T., & Ramsay, K. (1999). Teaching partner-focused questions to individuals who use augmentative and alternative communication to enhance their communicative competence. *Journal of Speech, Language, and Hearing Research, 42*, 241–255.
- McGregor, G., Young, J., Gerak, J., & Thomas, B. (1992). Increasing functional use of an assistive communication device by a student with severe disabilities. *Augmentative and Alternative Communication, 8*, 243–250.
- McMillan, J. M., & Renzaglia, A. (2014a). Supporting speech generating device use in the classroom. Part 1: Teacher professional development. *Journal of Special Education Technology, 29*, 31–47.
- McMillan, J. M., & Renzaglia, A. (2014b). Supporting speech generating device use in the classroom. Part Two: Student communication outcomes. *Journal of Special Education Technology, 29*, 49–61.
- Olive, M. L., De La Cruz, B., Davis, T. N., Chan, J. M., Lang, R. B., O'Reilly, M. F., & Dickson, S. M. (2007). The effects of enhanced milieu teaching and a voice output communication aid on the requesting of three children with autism. *Journal of Autism and Developmental Disorders, 37*, 1505–1513.
- Olive, M. L., Lang, R. B., & Davis, T. N. (2008). An analysis of the effects of functional communication and a voice output communication aid for a child with autism spectrum disorder. *Research in Autism Spectrum Disorders, 2*, 223–236.
- Schepis, M., Reid, D., & Behrmann, M. (1998). Increasing communicative interactions of young children with autism using a voice output communication aid and naturalistic teaching. *Journal of Applied Behavior Analysis, 31*, 561–578.
- Taylor, R., & Iacono, T. (2003). AAC and scripting activities to facilitate communication and play. *Advances in Speech Language Pathology, 5*, 79–93.
- Trembath, D., Balandin, S., Togher, L., & Stancliffe, R. J. (2009). Peer-mediated teaching and augmentative and alternative communication for preschool-aged children with autism. *Journal of Intellectual and Developmental Disability, 34*, 173–186.
- Trottier, N., Kamp, L., & Mirenda, P. (2011). Effects of peer-mediated instruction to teach use of speech-generating devices to students with autism in social game routines. *Augmentative and Alternative Communication, 27*, 26–39.
