# Supplementary material
Source: publisher figshare collection journal article supplement (https://asha.figshare.com/articles/dataset/_/6615332)
Supplement: Supplementary file 2 [file 2]

## Supplemental Material S2. General and specific strategy definitions.

| General strategy                | Operational definition                                                                                                                                                                                                                                                   | Specific strategy          | Operational definition                                                                                                                                                                |
|---------------------------------|--------------------------------------------------------------------------------------------------------------------------------------------------------------------------------------------------------------------------------------------------------------------------|----------------------------|---------------------------------------------------------------------------------------------------------------------------------------------------------------------------------------|
| Create or capture opportunities | The use of antecedents (i.e., events occurring prior to learner response) created or incidentally captured by interventionist/communication partners, that provided the learner with the occasion to, need to, ability to, or motivation to use a communicative response | Choice                     | Choice of topic to talk about provided                                                                                                                                                |
|                                 |                                                                                                                                                                                                                                                                          | Comment                    | Communication partner makes a comment about the environment, routine, or conversational topic                                                                                         |
|                                 |                                                                                                                                                                                                                                                                          | Device access              | SGD is made available/placed within closer proximity                                                                                                                                  |
|                                 |                                                                                                                                                                                                                                                                          | Environmental arrangements | Environment is modified in ways to promote communication using methods not otherwise specified                                                                                        |
|                                 |                                                                                                                                                                                                                                                                          | Follow lead                | Communication partner follows what the child shows interest in, in order to create new opportunities                                                                                  |
|                                 |                                                                                                                                                                                                                                                                          | Model play                 | Communication partner models play or imitates the child's play                                                                                                                        |
|                                 |                                                                                                                                                                                                                                                                          | Preferred items            | Previously identified preferred items are included in intervention                                                                                                                    |
|                                 |                                                                                                                                                                                                                                                                          | Proximity                  | Communication partner positions self closer to child                                                                                                                                  |
|                                 |                                                                                                                                                                                                                                                                          | Challenging behavior       | Communication partner captures a natural occurrence of challenging behavior (or moment where challenging behavior would be predicted) to promote a replacement communicative response |
|                                 |                                                                                                                                                                                                                                                                          | Read                       | Communication partner reads a section of a book to create an opportunity to respond                                                                                                   |
|                                 |                                                                                                                                                                                                                                                                          | Time delay                 | Communication partner pauses, or uses an expectant pause, prior to providing any model, prompt, or feedback to provide an opportunity for independent responding                      |
|                                 |                                                                                                                                                                                                                                                                          | Vocabulary                 | Vocabulary appropriate to the context of the natural routine is added to device                                                                                                       |
|                                 |                                                                                                                                                                                                                                                                          | Question                   | Communication partner asks a question about the environment, routine, or conversational topic (including scaffolded questions)                                                        |
| Feedback                        | Consequences delivered by interventionist/communication partners that occurred after the learner engaged in targeted or nontargeted responses                                                                                                                            | Error correction           | Communication partner models correct response following incorrect response                                                                                                            |
|                                 |                                                                                                                                                                                                                                                                          | Expansion                  | Communication partner repeats learner's response, but adds words to the initial utterance                                                                                             |
|                                 |                                                                                                                                                                                                                                                                          | Imitate                    | Communication partner imitates the learner's response                                                                                                                                 |
|                                 |                                                                                                                                                                                                                                                                          | Other                      | Communication partner provides verbal feedback or reinforcement not specified, or feedback that does not meet definition of other categories (e.g., follow up question, comment)      |

|              |                                                                                                                                             |                     |                                                                                           |
|--------------|---------------------------------------------------------------------------------------------------------------------------------------------|---------------------|-------------------------------------------------------------------------------------------|
|              |                                                                                                                                             | Praise              | Communication partner provides verbal praise                                              |
|              |                                                                                                                                             | Recast              | Communication partner rephrases the learner's response                                    |
|              |                                                                                                                                             | Reinforce request   | Communication partner provides learner with item requested                                |
| Modeling     | Interventionist or communication partner demonstrations of target expressive responses using either the SGD, natural speech, or manual sign | Augmented           | Communication partner models target words with the SGD                                    |
|              |                                                                                                                                             | Natural speech      | Communication partner vocally models target words                                         |
|              |                                                                                                                                             | Sign                | Communication partner models target words with manual sign                                |
| Prompting    | Extra stimuli used to cue expressive communication (including prompt hierarchies such as least-to-most).                                    | Gestural            | Communication partner uses physical gesture (e.g., pointing to SGD) to prompt use         |
|              |                                                                                                                                             | Physical            | Communication partner physically guides learner to use SGD                                |
|              |                                                                                                                                             | Not specified       | Prompts mentioned, but no information on type                                             |
|              |                                                                                                                                             | Verbal              | Communication partner vocally directs/reminds learner to use SGD                          |
| Train others | Procedures specifically described a protocol to train communication partners                                                                | Visual              | Communication partner uses visual stimuli to prompt SGD use                               |
|              |                                                                                                                                             | Paras               | Classroom assistants trained as interventionists                                          |
|              |                                                                                                                                             | Parents             | Parents trained as interventionists                                                       |
|              |                                                                                                                                             | Peers               | Peers trained as interventionists                                                         |
|              |                                                                                                                                             | SLPs                | SLPs trained as interventionists                                                          |
| Other        | Intervention components not meeting definitions listed above                                                                                | Teachers            | Teachers trained as interventionists                                                      |
|              |                                                                                                                                             | Attention           | Methods to increase attention/joint attention                                             |
|              |                                                                                                                                             | Errorless learning  | Methods used to prevent/block errors from occurring                                       |
|              |                                                                                                                                             | Functional analysis | Assessment conducted to determine function of challenging behavior                        |
|              |                                                                                                                                             | Pre-instruction     | Structured, non-naturalistic instruction provided prior to naturalistic (e.g., role play) |

*Note.* SGD = speech-generating device; SLP = speech-language pathologist.
