# Supplementary material
Source: publisher figshare collection journal article supplement (https://asha.figshare.com/articles/dataset/_/6615332)
Supplement: Supplementary file 3 [file 2]

**Supplemental Material S3.** Participants, speech-generating device (SGD) types/use, and routines/settings.

| <b>Article</b>            | <b>Age range</b>                     | <b>Diagnoses</b>                               | <b>SGD type</b>        | <b>SGD prior use</b> | <b>Routine</b>                        | <b>Setting</b>           |
|---------------------------|--------------------------------------|------------------------------------------------|------------------------|----------------------|---------------------------------------|--------------------------|
| Ballin et al. (2012)      | Secondary                            | Cerebral palsy (1)<br>Cerebral palsy/ID (1)    | Not stated             | Prior use            | Conversation                          | School                   |
| Bellon-Harn & Harn (2008) | Elementary                           | Multiple disability (1)                        | Simple                 | No prior             | Book reading                          | Clinic                   |
| Biggs et al. (2017)       | Elementary<br>Secondary              | Down syndrome (2)<br>ID (1)<br>Other (1)       | Not stated             | Prior use            | Classroom routines                    | School                   |
| Binger et al. (2008)      | Preschool                            | Speech disorder (2)                            | Intermediate           | No prior             | Book reading                          | Home                     |
| Binger et al. (2010)      | Preschool<br>Elementary              | DD (2)<br>Cerebral palsy (1)                   | Intermediate           | Prior use            | Book reading                          | School                   |
| Binger & Light (2007)     | Preschool                            | Down syndrome (1)<br>Other (2)                 | Intermediate           | Prior use            | Play                                  | School<br>Home           |
| Bingham et al. (2007)     | Secondary                            | Multiple disabilities (1)                      | Simple                 | Prior use            | Classroom routines                    | School                   |
| Chung & Carter (2013)     | Secondary                            | ID (2)                                         | Simple<br>Advanced     | Prior use            | Classroom routines                    | School                   |
| Chung & Douglas (2015)    | Elementary<br>Secondary              | ASD (3)                                        | Not stated             | Prior use            | School specials                       | School                   |
| Cosbey & Johnston (2006)  | Preschool<br>Elementary              | Cerebral palsy (2)<br>Cerebral palsy/Other (1) | Simple                 | No prior             | Play                                  | School                   |
| Datillo & Camarata (1991) | Secondary                            | Cerebral palsy/ID (1)                          | Advanced               | Prior use            | Conversation                          | Home                     |
| Dicarlo & Banajee (2000)  | Preschool                            | Other (2)                                      | Simple<br>Intermediate | No prior             | Meal                                  | School                   |
| Douglas et al. (2013)     | Preschool                            | Cerebral palsy/ Other (1)                      | Simple                 | Prior use            | Play                                  | School                   |
| Durand (1993)             | Preschool<br>Secondary               | Cerebral palsy/ ID (2)<br>ID (1)               | Simple                 | No prior             | Classroom routines                    | School                   |
| Durand (1999)             | Preschool<br>Elementary<br>Secondary | Cerebral palsy/ ID (2)<br>ID (1)<br>ASD/ID (2) | Simple                 | No prior             | Classroom routines<br>Meal<br>Leisure | School<br>Comm-<br>unity |

|                                           |                         |                                                 |                        |                       |                                 |                          |
|-------------------------------------------|-------------------------|-------------------------------------------------|------------------------|-----------------------|---------------------------------|--------------------------|
| Dyches (1998)                             | Elementary<br>Secondary | ASD/ID (2)<br>ID (1)                            | Simple                 | No prior              | Classroom<br>routines<br>Meal   | School                   |
| Edmister &<br>Wegner (2015)               | Elementary              | Cerebral palsy (2)<br>Other (1)                 | Advanced               | Prior use             | Book reading                    | School                   |
| Finke et al. (2017)                       | Elementary<br>Secondary | ASD (6)                                         | Intermediate           | Prior use<br>No prior | Book reading                    | School                   |
| Ganz et al. (2015)                        | Preschool               | ASD (2)                                         | Simple                 | No prior              | Book reading                    | Clinic                   |
| Harding et al.<br>(2009)                  | Preschool               | DD (2)                                          | Simple                 | Not clear             | Play                            | Home                     |
| Iacono & Duncam<br>(1995)                 | Preschool               | Down syndrome (1)                               | Intermediate           | Prior                 | Play                            | Clinic                   |
| Johnston et al.<br>(2003)                 | Preschool               | Cerebral palsy (1)<br>Multiple disabilities (1) | Simple                 | Not clear             | Meal<br>School<br>specials      | School                   |
| Kent-Walsh &<br>Binger (2010)             | Preschool<br>Elementary | Cerebral palsy (3)<br>Down syndrome (3)         | Simple<br>Intermediate | Prior use             | Book reading                    | Home                     |
| Light et al. (1999)                       | Elementary<br>Secondary | Cerebral palsy (1)<br>ID (1)                    | Advanced               | Prior use             | Conversation                    | School<br>Comm-<br>unity |
| McGregor et al.<br>(1992)                 | Secondary               | Cerebral palsy/ ID (1)                          | Advanced               | Prior use             | Vocation                        | School                   |
| McMillan &<br>Renzaglia<br>(2014a, 2014b) | Elementary              | ASD/ ID (4)                                     | Simple<br>Advanced     | Prior use             | Classroom<br>routines           | School                   |
| Olive et al. (2007)                       | Preschool               | ASD (3)                                         | Simple                 | No prior              | Play                            | School                   |
| Olive et al. (2008)                       | Preschool               | ASD (1)                                         | Simple                 | No prior              | Book reading<br>Play<br>Leisure | Home                     |
| Schepis et al.<br>(1998)                  | Preschool               | ASD (4)                                         | Simple<br>Intermediate | No prior              | Meal<br>Play                    | School                   |
| Taylor & Iacono<br>(2003)                 | Preschool               | ID (1)                                          | Simple                 | No prior              | Play                            | School                   |
| Trembath et al.<br>(2009)                 | Preschool               | ASD (3)                                         | Simple                 | No prior              | Play                            | School                   |
| Trottier et al.<br>(2011)                 | Secondary               | ASD (2)                                         | Intermediate           | Prior use             | Play                            | School                   |

*Note.* Preschool = participants ages 0–5 years; elementary = ages 6–10 years; secondary = ages 11–21 years; ASD = autism spectrum disorder; DD = developmental delay; ID = intellectual disability; other = specified developmental disability other than autism, cerebral palsy, or Down syndrome; simple = SGD included 1–12 available messages; intermediate = more than 12 available messages, but did not describe the use of navigation; advanced = utilized more than 12 messages and navigation.

## References

- Ballin, L., Balandin, S., & Stancliffe, R. J. (2012). The speech generating device (SGD) mentoring program: Supporting the development of people learning to use an SGD. *Journal of Developmental and Physical Disabilities, 25*, 437–459.
- Bellon-Harn, M. L., & Harn, W. E. (2008). Scaffolding strategies during repeated storybook reading an extension using a voice output communication aid. *Focus on Autism and Other Developmental Disabilities, 23*, 112–124.
- Biggs, E. E., Carter, E. W., & Gustafson, J. (2017). Efficacy of peer support arrangements to increase peer interaction and AAC use. *American Journal on Intellectual and Developmental Disabilities, 122*, 25–48.
- Binger, C., Kent-Walsh, J., Berens, J., Del Campo, S., & Rivera, D. (2008). Teaching Latino parents to support the multi-symbol message productions of their children who require AAC. *Augmentative and Alternative Communication, 24*, 323–338.
- Binger, C., Kent-Walsh, J., Ewing, C., & Taylor, S. (2010). Teaching educational assistants to facilitate the multisymbol message productions of young students who require augmentative and alternative communication. *American Journal of Speech-Language Pathology, 19*(2), 108–120.
- Binger, C., & Light, J. (2007). The effect of aided AAC modeling on the expression of multi-symbol messages by preschoolers who use AAC. *Augmentative and Alternative Communication, 23*, 30–43.
- Bingham, M. A., Spooner, F., & Browder, D. (2007). Training paraeducators to promote the use of augmentative and alternative communication by students with significant disabilities. *Education and Training in Developmental Disabilities, 42*, 339–352.
- Chung, Y. C., & Carter, E. W. (2013). Promoting peer interactions in inclusive classrooms for students who use speech-generating devices. *Research and Practice for Persons With Severe Disabilities, 38*, 94–109.
- Chung, Y. C., & Douglas, K. H. (2015). A peer interaction package for students with autism spectrum disorders who use speech-generating devices. *Journal of Developmental and Physical Disabilities, 27*, 831–849.
- Cosbey, J. E., & Johnston, S. (2006). Using a single-switch voice output communication aid to increase social access for children with severe disabilities in inclusive classrooms. *Research and Practice for Persons with Severe Disabilities, 31*, 144–156.
- Dattilo, J., & Camarata, S. (1991). Facilitating conversation through self-initiated augmentative communication treatment. *Journal of Applied Behavior Analysis, 24*, 369–378.
- Dicarlo, C. F., & Banajee, M. (2000). Using voice output devices to increase initiations of young children with disabilities. *Journal of Early Intervention, 23*, 191–199.
- Douglas, S. N., Light, J. C., & McNaughton, D. B. (2013). Teaching paraeducators to support the communication of young children with complex communication needs. *Topics in Early Childhood Special Education, 33*, 91–101.
- Durand, V. (1993). Functional communication training using assistive devices: Effects on challenging behavior and affect. *Augmentative and Alternative Communication, 9*, 168–176.
- Durand, V. M. (1999). Functional communication training using assistive devices: Recruiting natural communities of reinforcement. *Journal of Applied Behavior Analysis, 32*, 247–267.
- Dyches, T. T. (1998). Effects of switch training on the communication of children with autism and severe disabilities. *Focus on Autism and Other Developmental Disabilities, 13*, 151–162.
- Edmister, E., & Wegner, J. (2015). Repeated reading, turn taking, and augmentative and alternative communication (AAC). *International Journal of Disability, Development and Education, 62*, 319–338.
- Finke, E. H., Davis, J. M., Benedict, M., Goga, L., Kelly, J., Palumbo, L., . . . Waters, S. (2017). Effects of a least-to-most prompting procedure on multisymbol message production in children with autism spectrum disorder who use augmentative and alternative communication. *American Journal of Speech-Language Pathology, 26*, 81–98.
- Ganz, J. B., Hong, E. R., Gilliland, W., Morin, K., & Svenkerud, N. (2015). Comparison between visual scene displays and exchange-based communication in augmentative and alternative communication for children with ASD. *Research in Autism Spectrum Disorders, 11*, 27–41.
- Harding, J. W., Wacker, D. P., Berg, W. K., Winborn-Kemmerer, L., Lee, J. F., & Ibrahimovic, M. (2009). Analysis of multiple manding topographies during functional communication training. *Education & Treatment of Children, 32*, 21–36.
- Iacono, T. A., & Duncum, J. E. (1995). Comparison of sign alone and in combination with an electronic communication device in early language intervention: Case study. *Augmentative and Alternative Communication, 11*, 249–259.
- Johnston, S., McDonnell, A., & Nelson, C. (2003). Teaching functional communication skills using augmentative and alternative communication in inclusive settings. *Journal of Early Intervention, 25*, 263–280.
- Kent-Walsh, J., Binger, C., & Hasham, Z. (2010). Effects of parent instruction on the symbolic communication of children using augmentative and alternative communication during storybook reading. *American Journal of Speech-Language Pathology, 19*, 97–107.
- Light, J., Binger, C., Agate, T., & Ramsay, K. (1999). Teaching partner-focused questions to individuals who use augmentative and alternative communication to enhance their communicative competence. *Journal of Speech, Language, and Hearing Research, 42*, 241–255.
- McGregor, G., Young, J., Gerak, J., & Thomas, B. (1992). Increasing functional use of an assistive communication device by a student with severe disabilities. *Augmentative and Alternative Communication, 8*, 243–250.
- McMillan, J. M., & Renzaglia, A. (2014a). Supporting speech generating device use in the classroom. Part 1: Teacher professional development. *Journal of Special Education Technology, 29*, 31–47.
- McMillan, J. M., & Renzaglia, A. (2014b). Supporting speech generating device use in the classroom. Part Two: Student communication outcomes. *Journal of Special Education Technology, 29*, 49–61.
- Olive, M. L., De La Cruz, B., Davis, T. N., Chan, J. M., Lang, R. B., O'Reilly, M. F., & Dickson, S. M. (2007). The effects of enhanced milieu teaching and a voice output communication aid on the requesting of three children with autism. *Journal of Autism and Developmental Disorders, 37*, 1505–1513.
- Olive, M. L., Lang, R. B., & Davis, T. N. (2008). An analysis of the effects of functional communication and a voice output communication aid for a child with autism spectrum disorder. *Research in Autism Spectrum Disorders, 2*, 223–236.
- Schepis, M., Reid, D., & Behrmann, M. (1998). Increasing communicative interactions of young children with autism using a voice

- output communication aid and naturalistic teaching. *Journal of Applied Behavior Analysis*, *31*, 561–578.
- Taylor, R., & Iacono, T. (2003). AAC and scripting activities to facilitate communication and play. *Advances in Speech Language Pathology*, *5*, 79–93.
- Trembath, D., Balandin, S., Togher, L., & Stancliffe, R. J. (2009). Peer-mediated teaching and augmentative and alternative communication for preschool-aged children with autism. *Journal of Intellectual and Developmental Disability*, *34*, 173–186.
- Trottier, N., Kamp, L., & Mirenda, P. (2011). Effects of peer-mediated instruction to teach use of speech-generating devices to students with autism in social game routines. *Augmentative and Alternative Communication*, *27*, 26–39.
