# Supplementary material
Source: publisher figshare collection journal article supplement (https://asha.figshare.com/articles/dataset/_/6615332)
Supplement: Supplementary file 4 [file 2]

# **Supplemental Material S1.** Codes and definitions for participants, speech-generating devices (SGDs), dependent variables, and settings/routines.

| Category      | Code                           | Operational definition                                                                                 |
|---------------|--------------------------------|--------------------------------------------------------------------------------------------------------|
| Age group     | Preschool                      | Ages birth to 5 years                                                                                  |
|               | Elementary                     | Ages 6–10 years                                                                                        |
|               | Secondary                      | Ages 11–21 years                                                                                       |
| Diagnosis     | Autism spectrum disorder (ASD) | Specified diagnosis of autism, ASD, pervasive developmental disorder, or Asperger syndrome             |
|               | Cerebral palsy                 | Specified diagnosis of cerebral palsy                                                                  |
|               | Intellectual disability        | Specified intellectual disability or mental retardation (primary or secondary)                         |
|               | Developmental delay            | Specified primary diagnosis of developmental, language, or cognitive delay                             |
|               | Down syndrome                  | Specified diagnosis of Down syndrome                                                                   |
|               | Multiple disability            | Specified primary diagnosis of multiple disability                                                     |
|               | Speech disorder                | Specified primary diagnosis of a speech disorder (e.g., apraxia)                                       |
|               | Other                          | Specified diagnoses of other developmental disabilities not listed above (e.g., Prader–Willi syndrome) |
| SGD type      | Simple                         | SGD with 1–12 symbols per page (including switch device)                                               |
|               | Intermediate                   | SGD with more than 12 symbols, but no navigation described                                             |
|               | Advanced                       | SGD with more than 12 symbols per page, and navigation described                                       |
|               | Not stated                     | Unclear information about SGD (may have mentioned device name but not specifically number of messages) |
| SGD prior use | No prior use                   | Stated/implied participants had minimal to no prior SGD use                                            |
|               | Prior use                      | Stated/implied participants had previously used an SGD                                                 |
|               | Not stated                     | Prior use not clear or not stated                                                                      |
| Routine       | Book reading                   | Routines based around reading                                                                          |
|               | Classroom routines             | Routines typical of classroom (e.g., circle, group work)                                               |
|               | Conversation                   | Routines in which the primary activity was a conversation                                              |
|               | Leisure/recreation             | Non–school leisure activities such as sports, arts, shopping, movies                                   |
|               | Meal                           | Routine in which main activity surrounded eating/drinking                                              |
|               | Play                           | Routines specified as play, social games, board games                                                  |
|               | School specials                | School special routines such as art, music, library                                                    |
|               | Vocation                       | Routine involving work/career skills                                                                   |
| Setting       | School                         | School or daycare center                                                                               |
|               | Home                           | Primary place of residence (including residential facilities)                                          |
|               | Clinic                         | University clinic or laboratory                                                                        |
|               | Community                      | Community contexts (stores, restaurants, etc.)                                                         |
